# Supplementary material for: Topsoil Nutrients Drive Leaf Carbon and Nitrogen Concentrations of a Desert Phreatophyte in Habitats with Different Shallow Groundwater Depths
Source: MDPI journal article supplement (doi:10.3390/w13213093), 2021-11-03
Supplement: s1 [file s1]

Archive with 1 entries (1 files):
- water-1412362-supplementary.pdf
