# Supplementary material for: Topsoil Nutrients Drive Leaf Carbon and Nitrogen Concentrations of a Desert Phreatophyte in Habitats with Different Shallow Groundwater Depths
Source: MDPI journal article supplement (doi:10.3390/w13213093), 2021-11-03
Supplement: s1 [file s1 › water-1412362-supplementary.pdf]

## Supplementary File

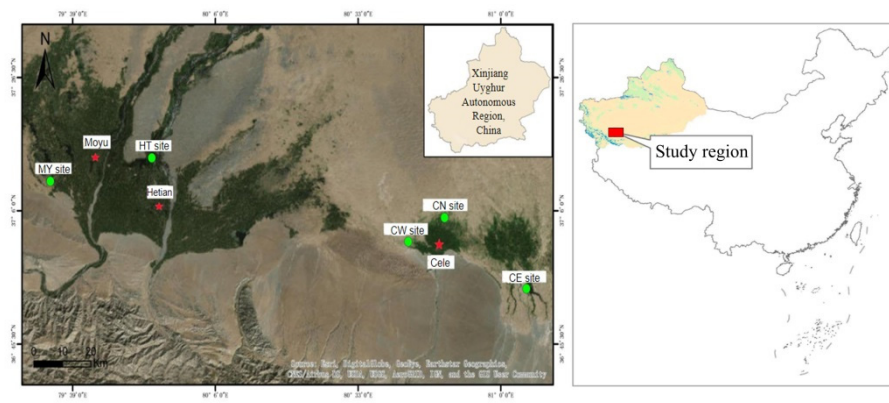

Figure S1. Location of the study sites. MY, Moyu county; HT, Hetian county; CW, west of Cele county; CN, north of Cele county; CE, east of Cele county.
